# Supplementary material for: HSP90 acts as a senomorphic target in senescent retinal pigmental epithelial cells
Source: PubMed Central journal article supplement (PMC8457597; doi:10.18632/aging.203496), 2021-09-08
Supplement: aging-13-203496-s001.pdf [file aging-13-203496-s001.pdf]

## SUPPLEMENTARY FIGURES

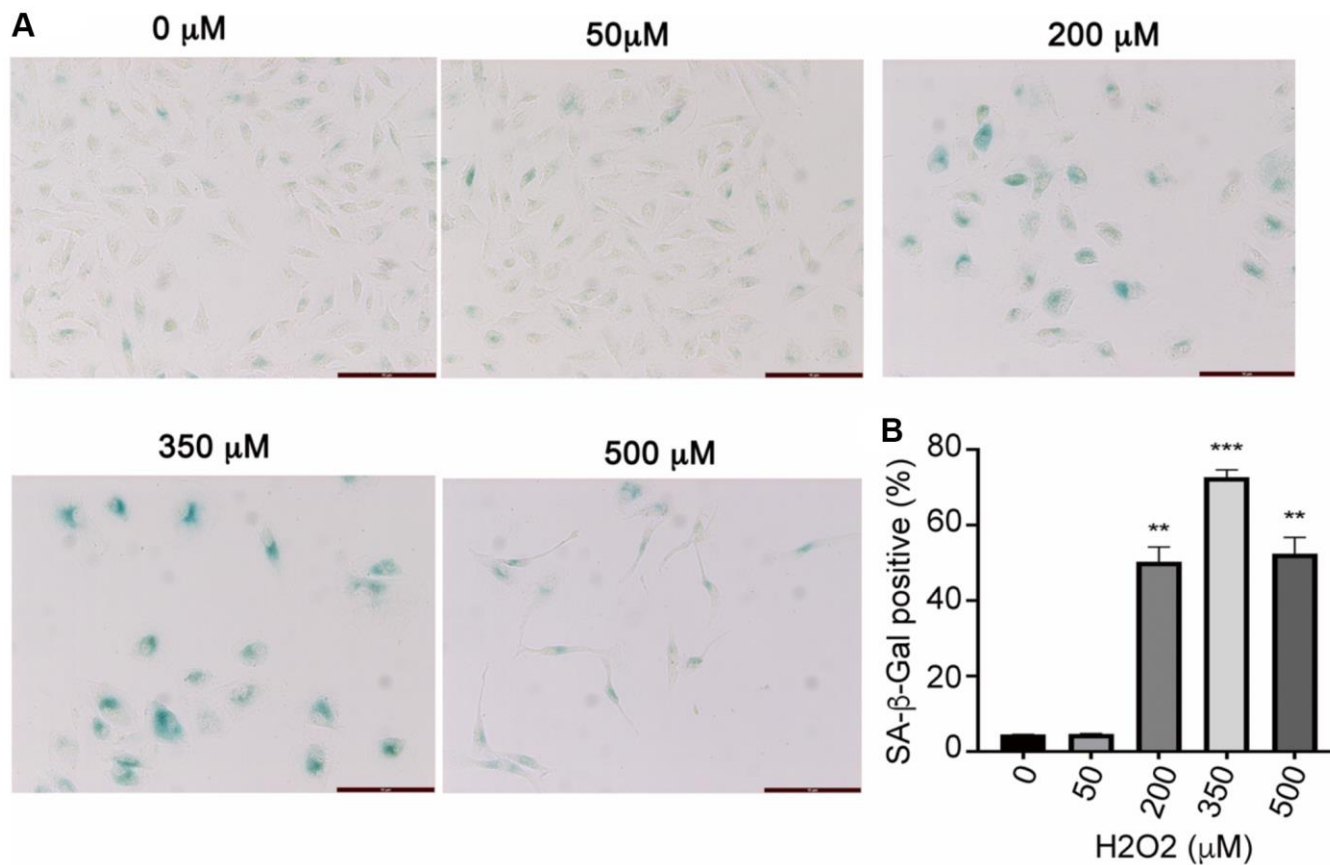

**Supplementary Figure 1. H<sub>2</sub>O<sub>2</sub> induces ARPE-19 cell senescence at different concentration.** (A) The ARPE-19 cells were treated with H<sub>2</sub>O<sub>2</sub> at 50, 200, 350 and 500  $\mu$ M for 2 hours followed by recovery in normal media for 3 days. The activity of SA- $\beta$ -Gal were stained. (B) The quantitation of SA- $\beta$ -Gal positive cells vs. total cell numbers was counted for from five fields of a view in A. The data shown in bar graph are mean  $\pm$  SD. The unpaired 2-tailed *t*-test was used for statistical analysis. *P* < 0.05 was considered to be statistical significant.

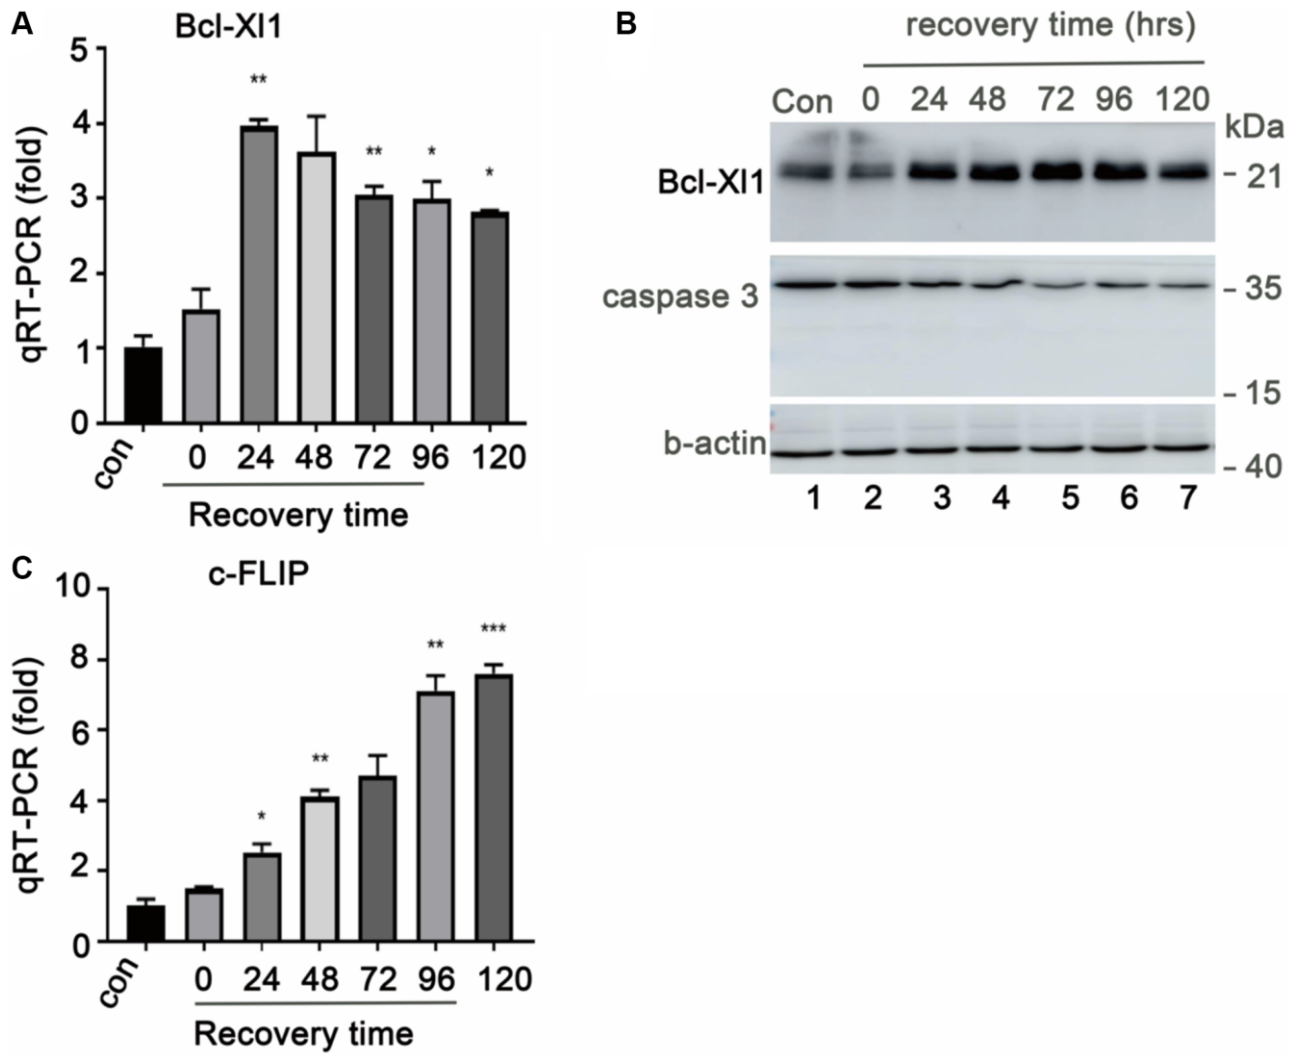

**Supplementary Figure 2. The upregulation of anti-apoptotic proteins Bcl-xL and c-FLIP in senescent ARPE-19 cells.** (A) Quantitative PCR to determine the expression of Bcl-xL mRNA in ARPE-19 cells at control condition (Con) or the cells treated with 200  $\mu$ M H<sub>2</sub>O<sub>2</sub> for 2 hours followed by recovery in normal media for 0, 24, 48, 72, 96 and 120 hours. (B) Immunoblot of Bcl-xL, Caspase 3 and b-actin proteins in the ARPE-19 cells treated in the same way as in A. (C) Quantitative PCR to determine the expression of c-FLIP in ARPE-19 cells treated in the same way as in A.

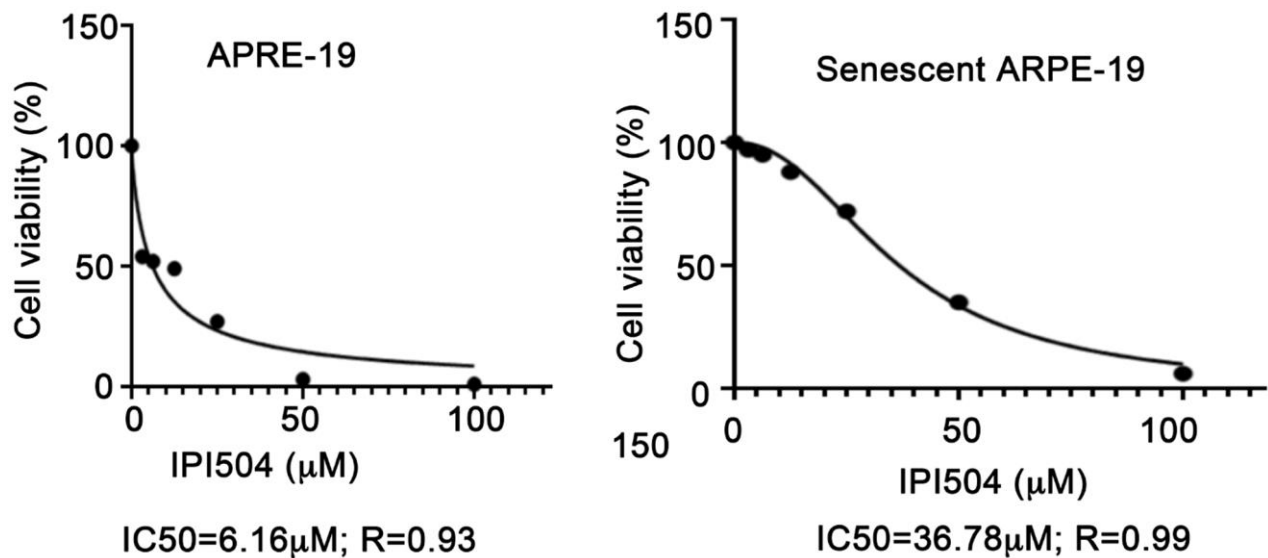

**Supplementary Figure 3.** The cytotoxicity of HSP90 inhibitor IPI-504 to the proliferating and senescent ARPE-19 cells. The proliferating and day-4 senescent ARPE-19 cells were treated with IPI-504 in different concentrations for 48 hours. The cell viability was measured with CCK-8 kit.

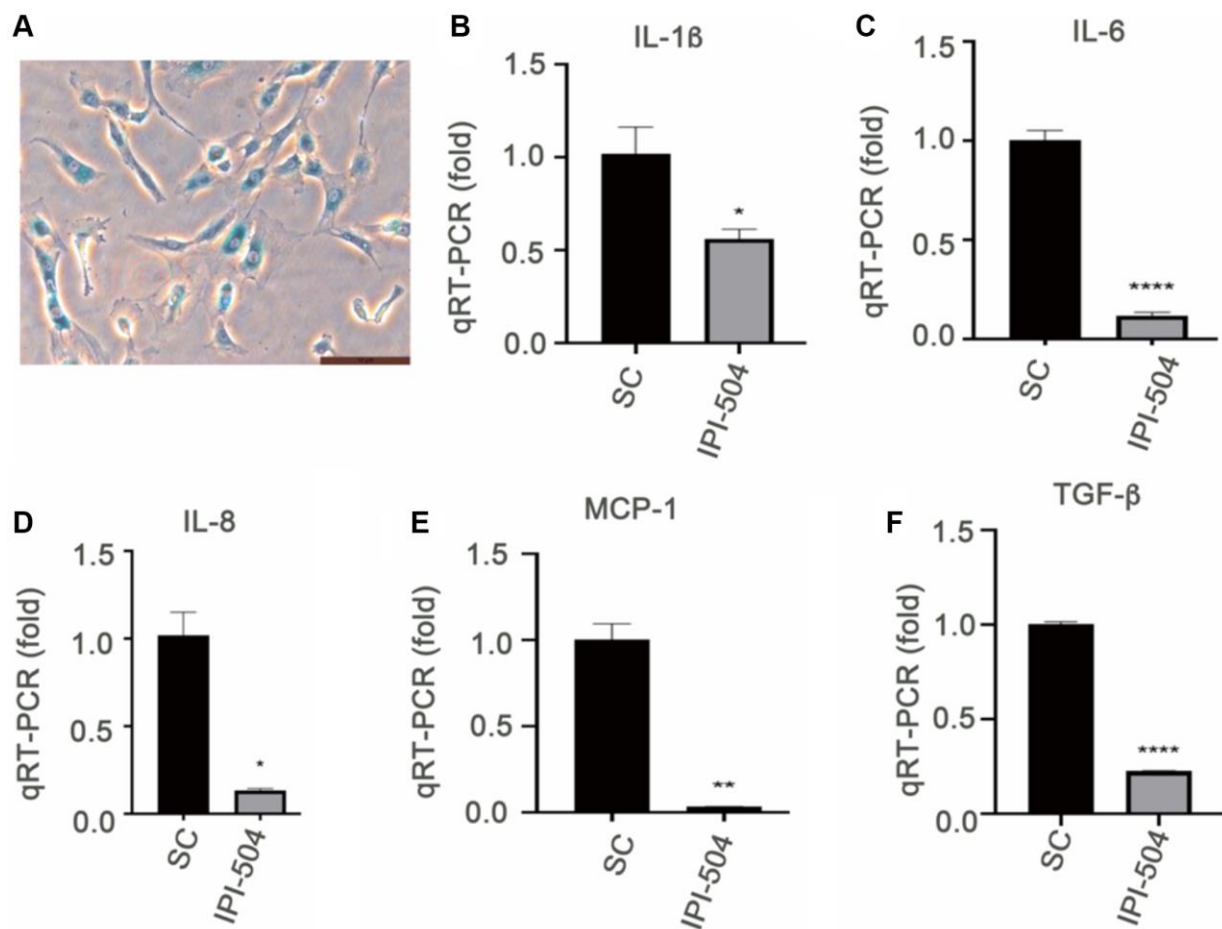

**Supplementary Figure 4.** IPI-504 inhibits mRNA expression of senescence-associated inflammatory factors in replicative senescent primary monkey RPE cells. (A) SA-b-Gal staining assay. The primary monkey RPE cells were cultured and passaged in DMEM/F12 media with 10% FBS for 8 generations. SA-b-Gal positive cells were stained. (B–F) Quantitative PCR to determine the mRNA expression of IL-1 $\beta$ , IL-6, IL-8, MCP-1 and TGF- $\beta$ 1 in the replicative senescent primary RPE cells treated with or without 1  $\mu\text{M}$  IPI-504 for 24 hours.

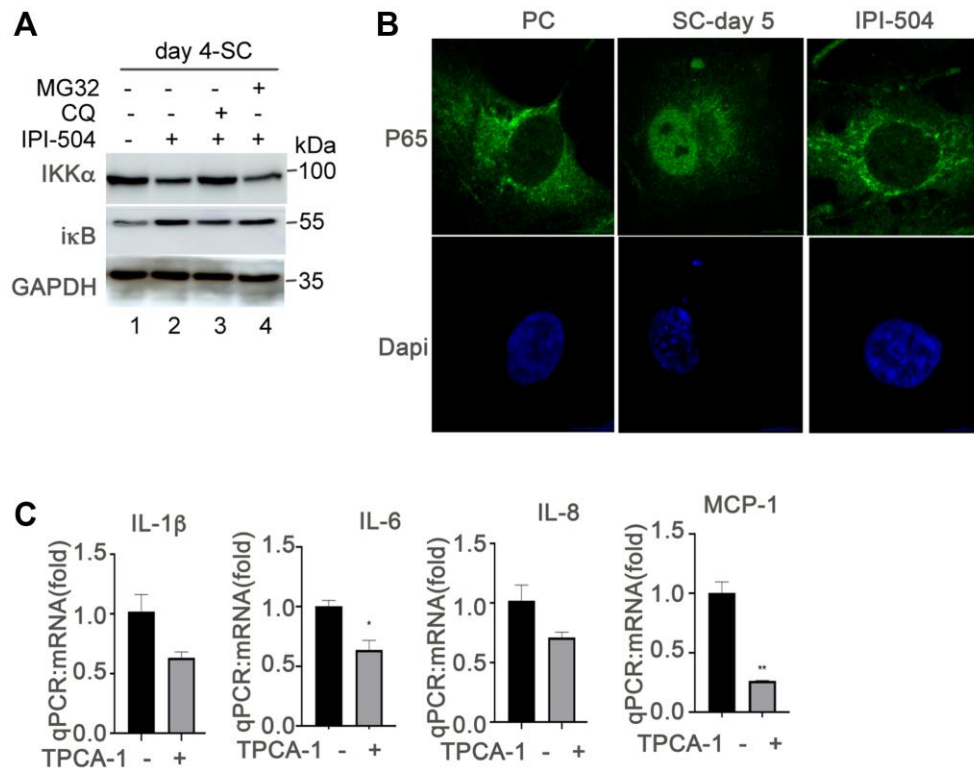

**Supplementary Figure 5. IKK $\alpha$ -NF- $\kappa$ B pathway is associated with HSP90-regulated SASP in senescent RPE cells.** (A) Immunoblot of IKK $\alpha$ , ikB and GAPDH proteins in day-4 senescent ARPE-19 cells treated with PBS (sham, lane 1), 5  $\mu$ M IPI-504 (lane 2), 5  $\mu$ M IPI-504 + 10  $\mu$ M chloroquine (CQ:24 h, lane 3) and 5  $\mu$ M IPI-504 + 10  $\mu$ M MG132 (MG132:6 h, lane 4). (B) Immunofluorescence staining to determine the localization of P65 proteins in proliferating ARPE-19 cells (PC), day-5 senescent ARPE-19 cells (SC-day 5) and day-5 senescent ARPE-19 cells treated with 1  $\mu$ M IPI-504 for 24 hours (IPI-504). The cell nucleus was stained with DAPI. (C) Quantitative PCR to determine the mRNA expression of IL-1 $\beta$ , IL-6, IL-8 and MCP-1 in replicative senescent primary monkey RPE cells (day-5) treated with DMSO (sham) or 1  $\mu$ M TPCA-1 (IKK $\alpha$ /IKK $\beta$  inhibitor) for 24 hours. The results are mean  $\pm$  SD ( $n = 4$ ). The unpaired 2-tailed  $t$ -test was used for statistical analysis. \* $P < 0.01$ , \*\* $P < 0.001$ .

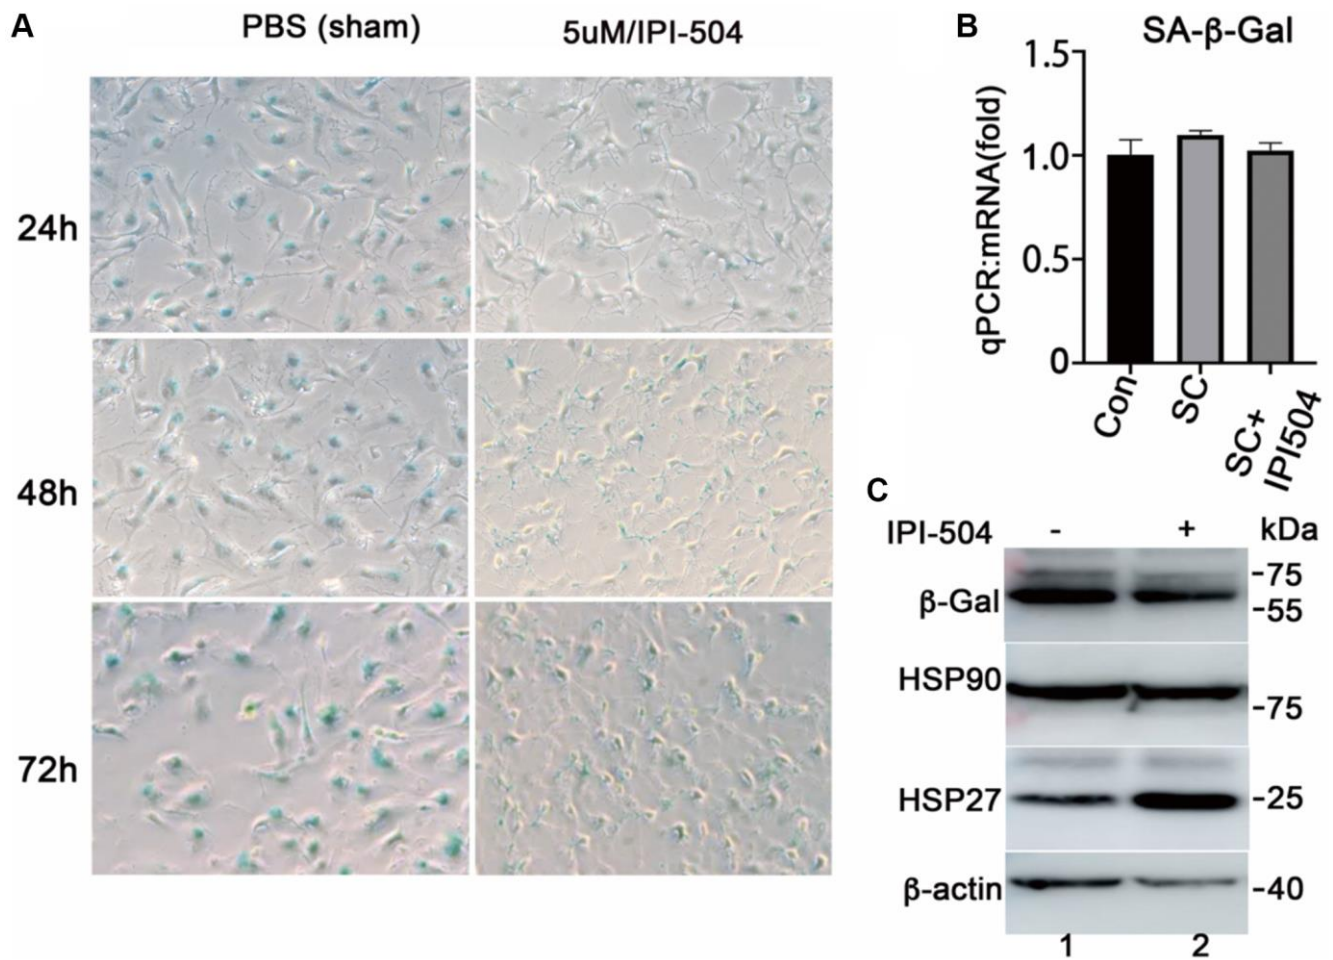

**Supplementary Figure 6. IPI-504 inhibits SA-b-Gal protein expression and activity.** (A) SA-b-Gal staining in the senescent ARPE-19 cells treated with sham (PBS) or 5  $\mu$ M IPI-504. The day 2 recovery cells after 2 hour  $H_2O_2$  treatment were incubated with complete media containing sham (PBS) or 5  $\mu$ M IPI-504 for up to 72 hours. The cells were stained for SA-b-Gal. (B) quantitative PCR to determine mRNA level of SA-b-Gal in control ARPE-19 cells, (Con), day-4 senescent ARPE-19 cells (SC) and day-4 senescent ARPE-19 treated with 5  $\mu$ M IPI-504 (SC + IPI-504) for 24 hours. (C) Immunoblot of b-Gal proteins expression in HeLa cells treated with sham (PBS, lane 1) and 1  $\mu$ M IPI-504 for 24 hours.

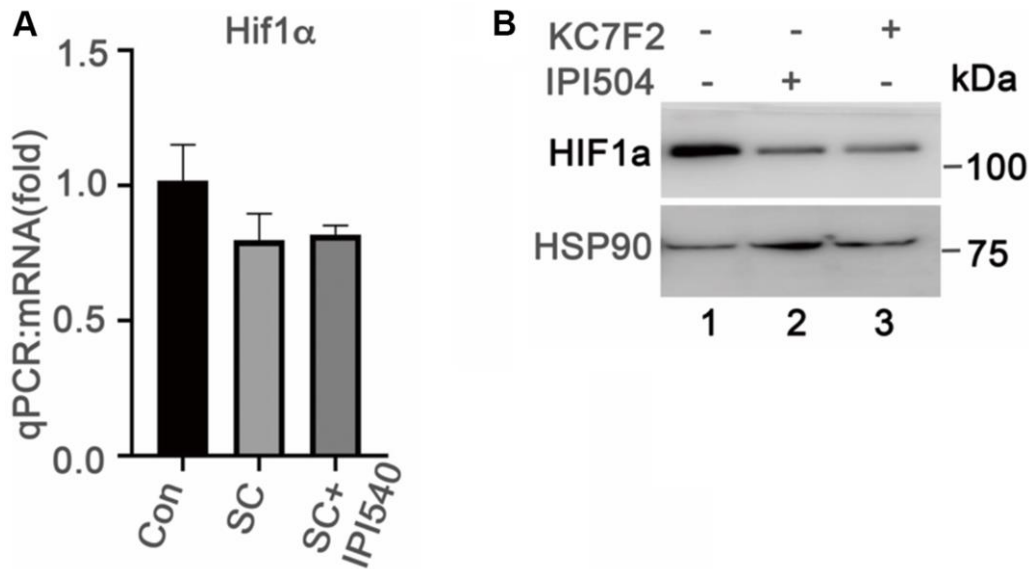

**Supplementary Figure 7. The IPI-504 inhibits HIF1a protein expression in senescent ARPE-19 cells.** (A) quantitative PCR to determine HIF1a mRNA in proliferating ARPE-19 cells (Con), day-4 senescent ARPE-19 cells (SC) and Day-4 senescent ARPE-19 cells (SC) treated with 1  $\mu$ M IPI-504 for 24 hours (SC + IPI-504). (B) Immunoblot of HIF1a and HSP90a in day-4 senescent ARPE-19 cells treated with sham (PBS, lane 1), IPI-504 (lane 2) and KC7F2, an inhibitor of HIF1a (lane 3).

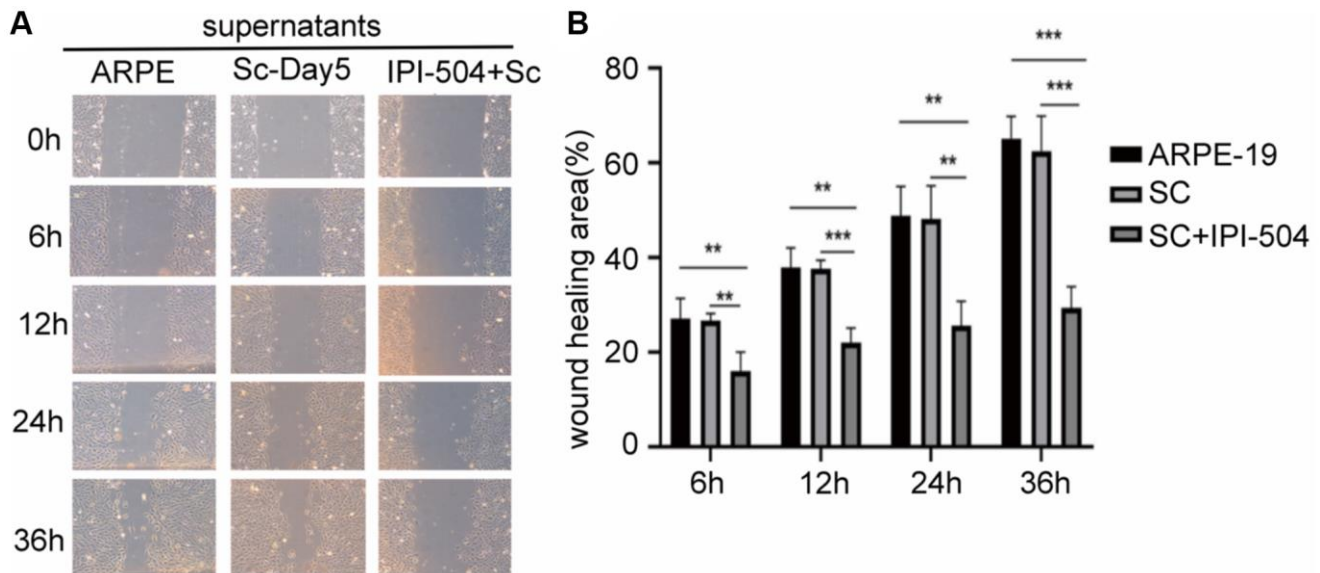

**Supplementary Figure 8. IPI-504 inhibits senescent ARPE-19 mediated cell migration.** (A) The wound-healing assay, the confluent ARPE-19 cells were scratched and incubated with conditional supernatants from proliferating ARPE-19 cells, Day-5 senescent ARPE-19 cells and Day-5 senescent ARPE-19 cells pretreated by 5  $\mu$ M IPI-504 for 24 hours. (B) Quantitation of the area of wound closure in A in image J. The results were from three independent experiments. The unpaired 2-tailed *t*-test was used for statistical analysis. \*\* $P < 0.01$ ; \*\*\* $P < 0.001$ .
